# Supplementary material for: In vitro antibiofilm activity of Aquilaria malaccensis leaf extracts and literature-derived docking studies on LasR and RhIR of Pseudomonas aeruginosa
Source: Research Square preprint supplement (doi:10.21203/rs.3.rs-7082118/v1), 2026-01-07
Supplement: Supplementary file 1 [file 6f918e1388158d7066ea3717.docx]

**Figure S1.**  *Aquilaria malaccensis* trees growing in the collection site (**Latitude:** 26.125183° N, **Longitude:** 91.899823° E).

**Figure S2.** UV-VIS spectrum obtained for the ethanolic, ethyl acetate and hexane extracts of *A. malaccensis* leaves

**Figure S3.** The stained biofilms of the microplate wells using 1% of crystal violet solution, (A) hexane extract (yellow box), (B) ethyl acetate (black box), (C) ethanolic extract (blue box) in comparison to growth control (green box) and blank (maroon box).

**Table S1.** Inhibitory Zone Diameters (mm) of *Aquilaria malaccensis* Leaf Extracts Against Bacterial Isolates

| **Bacterial Isolate** | **Hexane Extract** | **Ethyl Acetate Extract** | **Ethanolic Extract** | **DMSO (Negative Control)** |
| --- | --- | --- | --- | --- |
| *Staphylococcus epidermidis* (ATCC 35984) | 8 mm | 10 mm | – | – |
| *Klebsiella pneumoniae* (ATCC BAA-1705) | 10 mm | 12 mm | – | – |
| *Klebsiella pneumoniae* (clinical isolate) | 13 mm | 15 mm | 10 mm | – |
| *Klebsiella pneumoniae* 357 | – | 10 mm | – | – |
| *Escherichia coli* 106 | – | – | – | – |
| *Escherichia coli* 99 | – | 11 mm | – | – |
| *Pseudomonas aeruginosa* 479 | – | 20 mm | – | – |
| *Pseudomonas aeruginosa* 2728 | – | 10 mm | – | – |
| *Acinetobacter baumannii* | 8 mm | 8 mm | 9 mm | – |
| *Proteus mirabilis* | 9 mm | – | 8 mm | – |
| *Enterococcus* spp. | 9 mm | 9 mm | – | – |
